# Supplementary material
Source: Springer Nature journal article supplement (https://www.springermedizin.de/resource/supplementary/12913_2009_1051_MOESM3_ESM.pdf/9536236)
Supplement: MOESM3 [file 9536236]

**a) Total Physicians**

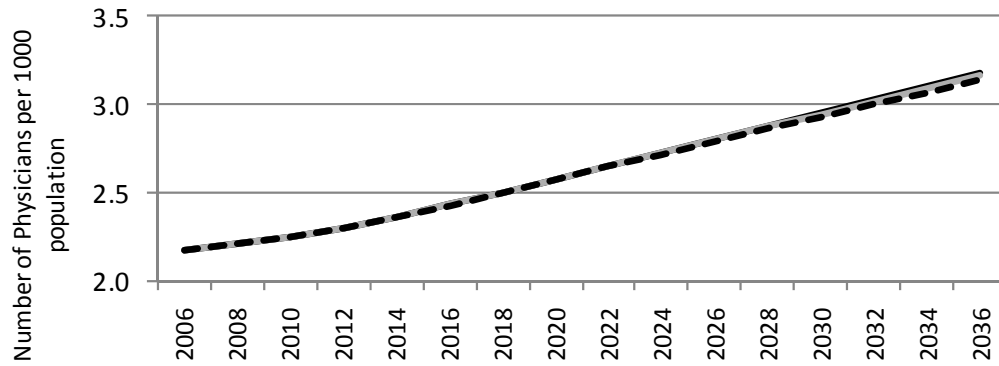

**b) Surgery**

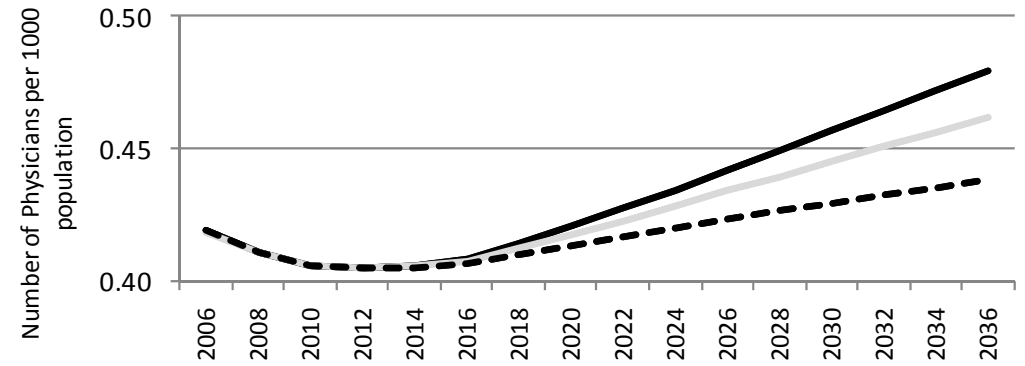

**c) Pediatrics**

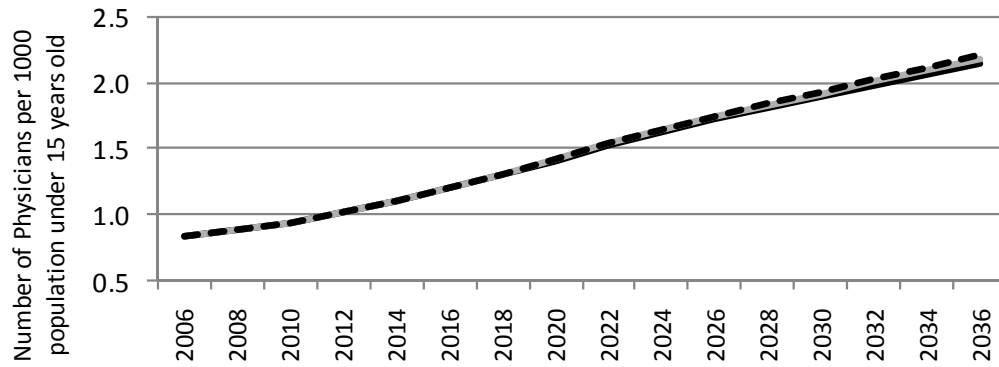

**d) Obstetrics and Gynecology**

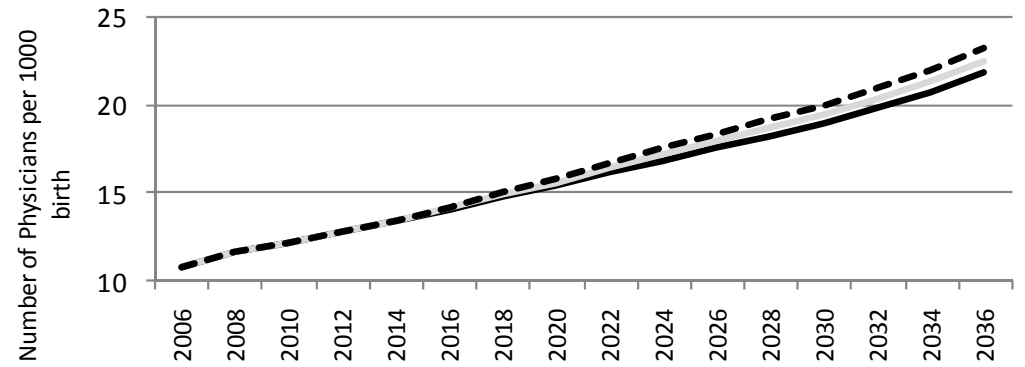

**e) Internal Medicine**

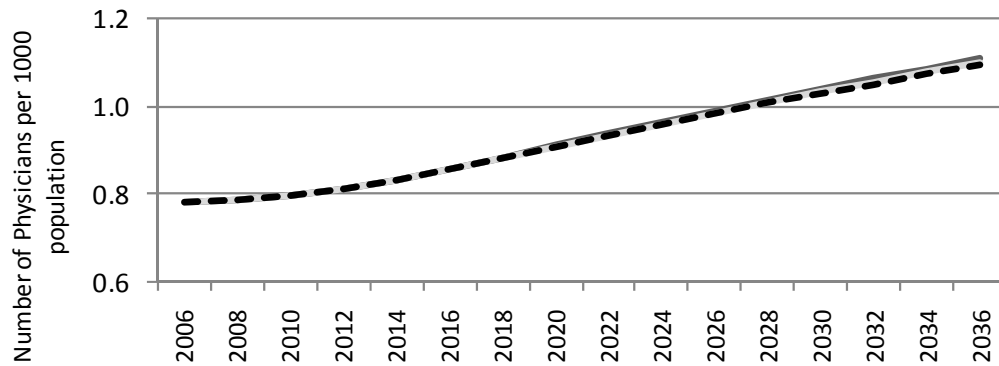

— Current proportion    — 40% female    - - - 50% female
